# Supplementary material for: Developing Culturally Sensitive mHealth Apps for Caribbean Immigrant Women to Use During Pregnancy: Focus Group Study
Source: PubMed Central journal article supplement (PMC6231776; doi:10.2196/humanfactors.9787), 2018-10-10
Supplement: humanfactors_v5i4e29_app1.pdf [file humanfactors_v5i4e29_app1.pdf]

ppendix I      Procedures Script

Focus Groups:

Reflect on your pregnancy experiences as an immigrant related to the following

keywords (topics)?

| <b>Keyword</b> | <b>Moderator add-on probes</b>                                                                                                                                                                                                                                                                                                                                                                               |
|----------------|--------------------------------------------------------------------------------------------------------------------------------------------------------------------------------------------------------------------------------------------------------------------------------------------------------------------------------------------------------------------------------------------------------------|
| Pregnancy      | <ul style="list-style-type: none"><li>• In your opinion, what does it take to have a healthy pregnancy?</li><li>• What was challenging during your pregnancy?</li><li>• How did you obtain your pregnancy information?</li></ul>                                                                                                                                                                             |
| Relationships  | <ul style="list-style-type: none"><li>• Whom do you most often communicate with in the US or your home country during your pregnancy?</li><li>• Can you describe the roles relationships with domestic partner, friends, and family play in your understandings of pregnancy?</li><li>• What are the strengths and weaknesses of each that might at times make one take precedence over the other?</li></ul> |
| Organizations  | <ul style="list-style-type: none"><li>• Discuss the role of care providers and social or religious organizations whether in the US or your home country during pregnancy in the states?</li></ul>                                                                                                                                                                                                            |
